# Supplementary material
Source: Springer Nature journal article supplement (https://www.springermedizin.de/resource/supplementary/12955_2005_222_MOESM4_ESM.pdf/9559934)

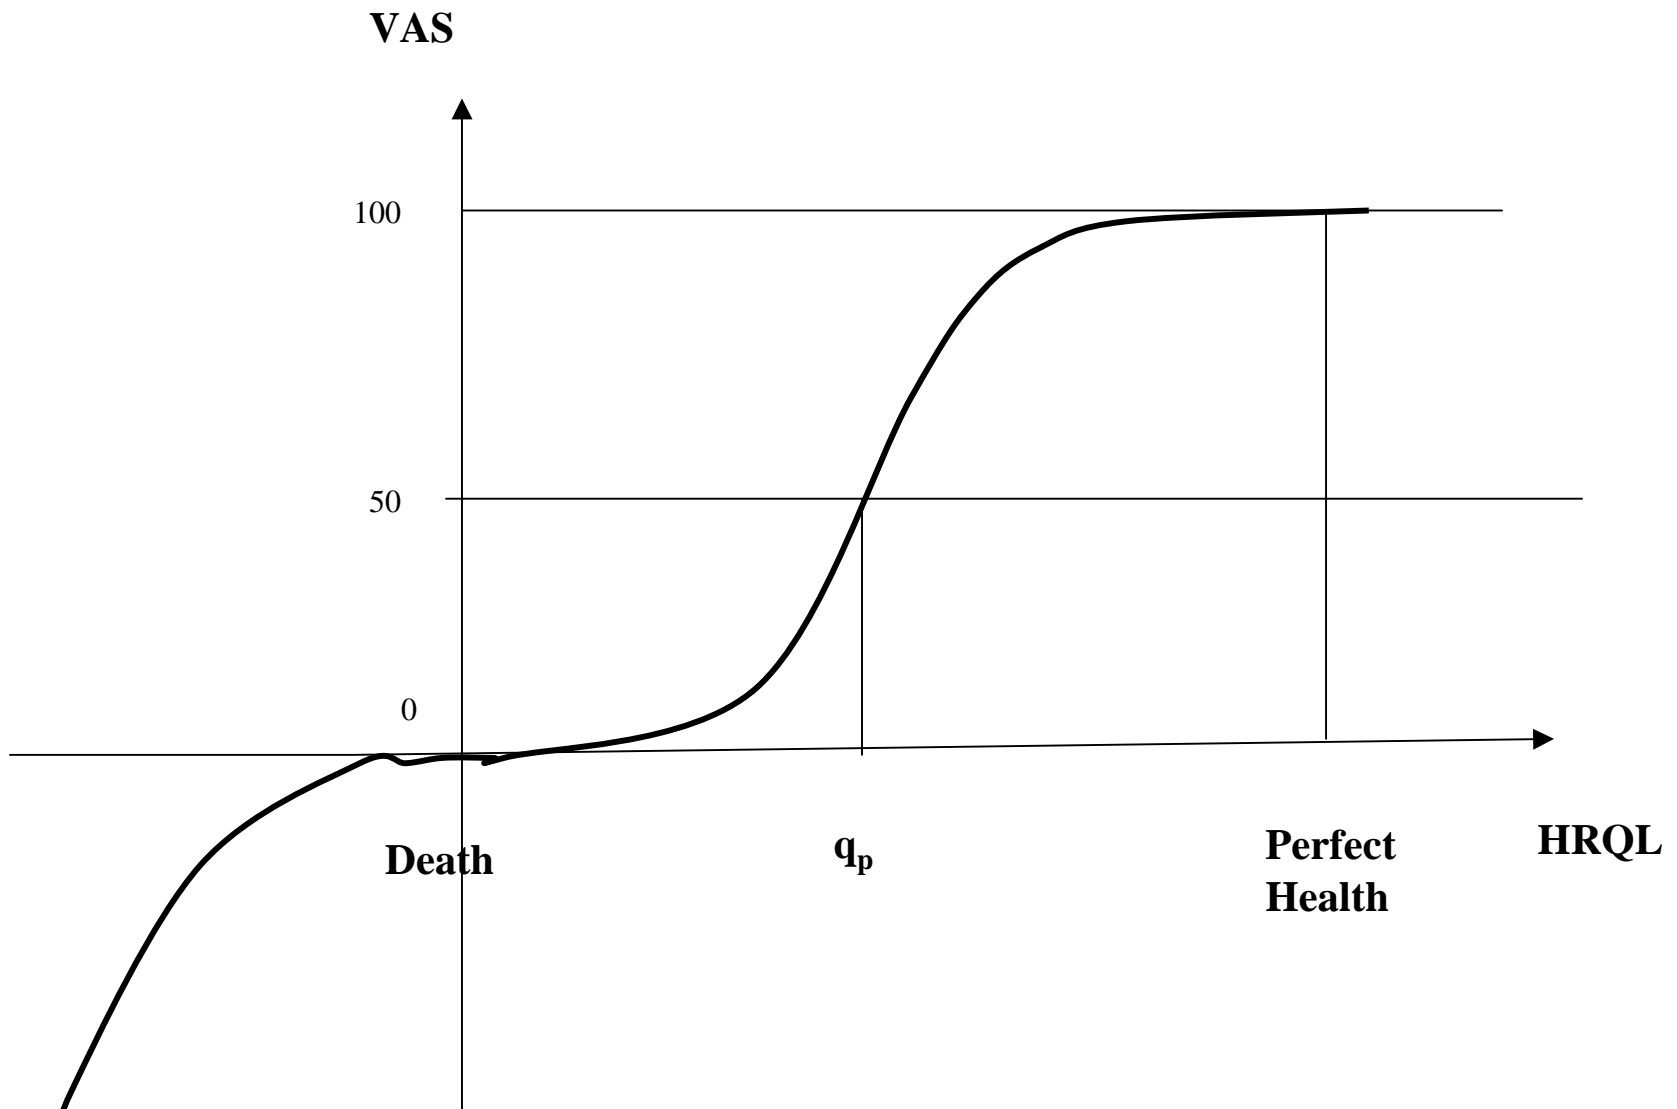

Supplement: MOESM4 [file 9559934]
